# Supplementary material
Source: MDPI journal article supplement (https://www.mdpi.com/2071-1050/15/16/12643)
Supplement: s1 [file s1]

| No.                                               | 1  | 2   | 3  | 4  | 5 | 6   | 7  | 8   |
|---------------------------------------------------|----|-----|----|----|---|-----|----|-----|
| <i>Achillea millefolium</i> ssp. <i>sudetica</i>  | 0  | 0   | I  | 0  | 0 | 0   | 0  | IV  |
| <i>Achillea schurii</i>                           | 0  | 0   | 0  | I  | 0 | 0   | 0  | 0   |
| <i>Achillea stricta</i>                           | 0  | I   | 0  | 0  | I | 0   | 0  | 0   |
| <i>Acinos alpinus</i>                             | 0  | 0   | I  | 0  | 0 | 0   | 0  | 0   |
| <i>Aconitum lasianthum</i>                        | 0  | 0   | 0  | 0  | 0 | 0   | I  | 0   |
| <i>Agrostis capillaris</i> ssp. <i>capillaris</i> | 0  | 0   | 0  | II | 0 | 0   | 0  | IV  |
| <i>Agrostis rupestris</i>                         | 0  | 0   | 0  | I  | 0 | 0   | 0  | 0   |
| <i>Ajuga reptans</i>                              | 0  | 0   | 0  | 0  | 0 | I   | 0  | I   |
| <i>Alchemilla flabelata</i>                       | 0  | IV  | 0  | 0  | 0 | 0   | 0  | I   |
| <i>Alchemilla xanthochlora</i>                    | 0  | 0   | II | 0  | 0 | 0   | 0  | III |
| <i>Allium ochroleucum</i>                         | 0  | III | 0  | 0  | 0 | 0   | 0  | 0   |
| <i>Allium senescens</i> ssp. <i>montanum</i>      | I  | 0   | 0  | 0  | 0 | III | 0  | 0   |
| <i>Alyssum repens</i>                             | I  | II  | 0  | 0  | 0 | 0   | 0  | 0   |
| <i>Androsace lactaea</i>                          | 0  | 0   | 0  | 0  | 0 | 0   | 0  | 0   |
| <i>Antennaria dioica</i>                          | 0  | 0   | 0  | 0  | 0 | 0   | 0  | 0   |
| <i>Anthemis carpatica</i>                         | 0  | 0   | 0  | 0  | 0 | 0   | 0  | 0   |
| <i>Anthoxanthum odoratum</i>                      | 0  | V   | 0  | 0  | 0 | 0   | 0  | IV  |
| <i>Anthyllis vulneraria</i> ssp. <i>alpestris</i> | IV | 0   | 0  | 0  | 0 | 0   | 0  | 0   |
| <i>Arabis alpina</i>                              | 0  | 0   | 0  | 0  | 0 | 0   | 0  | 0   |
| <i>Armeria alpina</i>                             | 0  | I   | 0  | 0  | 0 | I   | 0  | 0   |
| <i>Asperula capitata</i>                          | II | 0   | 0  | 0  | 0 | 0   | II | 0   |
| <i>Asplenium viride</i>                           | 0  | 0   | I  | 0  | 0 | 0   | 0  | 0   |
| <i>Aster alpinum</i>                              | 0  | 0   | 0  | II | I | 0   | 0  | 0   |
| <i>Astragalus alpinus</i>                         | 0  | 0   | 0  | 0  | 0 | 0   | 0  | 0   |
| <i>Astragalus frigidus</i>                        | I  | 0   | 0  | 0  | 0 | 0   | 0  | 0   |
| <i>Astranta major</i>                             | 0  | 0   | I  | 0  | 0 | 0   | 0  | 0   |
| <i>Avenula pubescens</i> ssp. <i>pubescens</i>    | I  | 0   | 0  | 0  | 0 | 0   | 0  | 0   |
| <i>Avenula versicolor</i>                         | 0  | II  | 0  | I  | 0 | 0   | 0  | 0   |
| <i>Bartsia alpina</i>                             | 0  | I   | 0  | 0  | 0 | 0   | 0  | 0   |

|                                         |    |     |     |    |     |     |     |     |
|-----------------------------------------|----|-----|-----|----|-----|-----|-----|-----|
| Bellardiochloa variegata                | 0  | I   | 0   | 0  | 0   | 0   | 0   | 0   |
| Biscutella laevigata                    | II | III | 0   | 0  | 0   | 0   | 0   | 0   |
| Botrychium lunaria                      | I  | I   | 0   | 0  | 0   | 0   | 0   | 0   |
| Briza media                             | 0  | 0   | 0   | 0  | 0   | 0   | 0   | 0   |
| Bromus barcensis                        | I  | 0   | 0   | 0  | 0   | 0   | 0   | 0   |
| Bruckenthalia spiculifolia              | 0  | 0   | 0   | II | 0   | 0   | 0   | 0   |
| Bupleurum falcatum ssp. cernuum         | IV | II  | II  | 0  | 0   | 0   | 0   | 0   |
| Calamagrostis arundinacea               | 0  | 0   | 0   | 0  | II  | 0   | 0   | 0   |
| Campanula alpina                        | II | 0   | 0   | 0  | 0   | III | 0   | 0   |
| Campanula glomerata                     | I  | 0   | 0   | 0  | I   | 0   | 0   | 0   |
| Campanula kladiana                      | I  | 0   | 0   | I  | 0   | 0   | 0   | 0   |
| Campanula patula ssp. abietina          | 0  | 0   | 0   | 0  | I   | 0   | 0   | 0   |
| Campanula serrata                       | 0  | 0   | 0   | 0  | 0   | I   | 0   | III |
| Campanula serrata                       | 0  | II  | 0   | 0  | 0   | 0   | 0   | 0   |
| Cardaminopsis arenosa                   | 0  | 0   | 0   | II | 0   | 0   | 0   | 0   |
| Carduus kernerii                        | I  | 0   | 0   | 0  | I   | 0   | 0   | 0   |
| Carex capillaris                        | 0  | 0   | 0   | 0  | 0   | 0   | III | 0   |
| Carex curvula                           | 0  | 0   | III | 0  | 0   | 0   | 0   | 0   |
| Carex montana                           | 0  | 0   | 0   | 0  | III | 0   | 0   | 0   |
| Carex ornithopoda ssp. ornithopoda      | II | 0   | 0   | 0  | 0   | 0   | 0   | 0   |
| Carex ovalis                            | 0  | 0   | 0   | 0  | 0   | 0   | 0   | 0   |
| Carex sempervirens                      | V  | V   | 0   | 0  | 0   | 0   | 0   | 0   |
| Carlina acaulis                         | I  | 0   | 0   | 0  | 0   | 0   | 0   | II  |
| Centaurea pinnatifida                   | II | 0   | II  | 0  | 0   | 0   | 0   | 0   |
| Centaurea triumpheti                    | I  | 0   | 0   | 0  | 0   | III | 0   | 0   |
| Cerastium alpinum ssp. lanatum          | 0  | 0   | 0   | II | 0   | 0   | 0   | 0   |
| Cerastium alpinum var. lanatum          | 0  | 0   | 0   | 0  | III | 0   | 0   | 0   |
| Cerastium arvense ssp. arvense          | 0  | 0   | 0   | 0  | 0   | 0   | 0   | I   |
| Cerastium arvense ssp. lerchenfeldianum | I  | III | 0   | 0  | III | 0   | 0   | 0   |
| Cerastium fontanum ssp. fontanum        | 0  | 0   | 0   | 0  | 0   | I   | 0   | 0   |

|                                                   |     |     |   |    |    |    |    |     |
|---------------------------------------------------|-----|-----|---|----|----|----|----|-----|
| <i>Cerastium fontanum</i> ssp. <i>macrocarpum</i> | 0   | 0   | 0 | 0  | 0  | 0  | 0  | I   |
| <i>Cerastium transsilvanicum</i>                  | IV  | II  | 0 | 0  | 0  | 0  | 0  | 0   |
| <i>Cerithe glabra</i>                             | 0   | 0   | 0 | I  | 0  | 0  | 0  | 0   |
| <i>Chamorchis alpina</i>                          | 0   | 0   | 0 | 0  | 0  | 0  | 0  | 0   |
| <i>Cirsium erisithales</i>                        | 0   | 0   | 0 | I  | 0  | 0  | 0  | 0   |
| <i>Cirsium furiens</i>                            | I   | 0   | 0 | 0  | 0  | I  | 0  | 0   |
| <i>Cnidium silarifolium</i>                       | 0   | 0   | 0 | 0  | 0  | 0  | 0  | 0   |
| <i>Coeloglossum viride</i>                        | 0   | III | 0 | 0  | 0  | 0  | 0  | 0   |
| <i>Crepis paludosa</i>                            | 0   | 0   | 0 | 0  | I  | 0  | 0  | 0   |
| <i>Crocus vernus</i> ssp. <i>vernus</i>           | 0   | 0   | 0 | 0  | 0  | 0  | 0  | 0   |
| <i>Cynosurus cristatus</i>                        | 0   | 0   | I | 0  | 0  | 0  | 0  | IV  |
| <i>Cystopteris alpina</i>                         | 0   | 0   | 0 | 0  | 0  | II | 0  | 0   |
| <i>Danthonia decumbens</i>                        | 0   | 0   | 0 | 0  | 0  | 0  | 0  | I   |
| <i>Deschampsia caespitosa</i>                     | 0   | 0   | 0 | 0  | 0  | 0  | 0  | III |
| <i>Deschampsia flexuosa</i>                       | 0   | 0   | 0 | 0  | 0  | 0  | 0  | IV  |
| <i>Dianthus glacialis</i> ssp. <i>gelidus</i>     | 0   | 0   | 0 | II | 0  | 0  | 0  | 0   |
| <i>Dianthus spiculifolius</i>                     | I   | 0   | 0 | 0  | 0  | 0  | 0  | 0   |
| <i>Dianthus tenuifolius</i>                       | IV  | III | 0 | 0  | 0  | 0  | 0  | 0   |
| <i>Doronicum carpaticum</i>                       | 0   | 0   | 0 | 0  | II | 0  | 0  | 0   |
| <i>Doronicum columnae</i>                         | 0   | 0   | 0 | 0  | 0  | 0  | II | 0   |
| <i>Dryas octopetala</i>                           | 0   | 0   | 0 | 0  | 0  | II | 0  | 0   |
| <i>Erigeron uniflorus</i>                         | 0   | 0   | 0 | 0  | 0  | 0  | 0  | 0   |
| <i>Euphorbia amygdaloides</i>                     | 0   | 0   | 0 | 0  | 0  | 0  | I  | 0   |
| <i>Euphrasia saliburgensis</i>                    | 0   | 0   | 0 | 0  | 0  | 0  | 0  | 0   |
| <i>Euphrasia stricta</i>                          | 0   | 0   | 0 | 0  | 0  | 0  | 0  | 0   |
| <i>Festuca airoides</i>                           | 0   | 0   | V | 0  | 0  | 0  | 0  | 0   |
| <i>Festuca amethystina</i>                        | III | V   | 0 | 0  | 0  | 0  | 0  | 0   |
| <i>Festuca carpatica</i>                          | 0   | 0   | 0 | V  | 0  | 0  | 0  | 0   |
| <i>Festuca glacialis</i>                          | 0   | 0   | 0 | 0  | V  | 0  | 0  | 0   |
| <i>Festuca violacea</i>                           | 0   | 0   | I | 0  | 0  | V  | I  | IV  |

|                                                          |     |     |    |    |    |     |    |     |
|----------------------------------------------------------|-----|-----|----|----|----|-----|----|-----|
| <i>Festuca rupicola</i> ssp. <i>saxatilis</i>            | III | 0   | 0  | 0  | 0  | 0   | 0  | I   |
| <i>Festuca versicolor</i>                                | IV  | I   | 0  | 0  | 0  | 0   | V  | 0   |
| <i>Fragaria vesca</i>                                    | 0   | 0   | 0  | 0  | I  | 0   | 0  | 0   |
| <i>Galium album</i>                                      | I   | 0   | II | 0  | 0  | 0   | 0  | 0   |
| <i>Galium anisophyllum</i>                               | 0   | III | 0  | 0  | 0  | 0   | 0  | 0   |
| <i>Galium verum</i>                                      | 0   | 0   | 0  | 0  | I  | 0   | 0  | III |
| <i>Genista tinctoria</i> ssp. <i>oligosperma</i>         | 0   | 0   | 0  | I  | 0  | 0   | 0  | 0   |
| <i>Gentiana acaulis</i>                                  | 0   | I   | 0  | 0  | 0  | 0   | 0  | 0   |
| <i>Gentiana asclepiadea</i>                              | 0   | 0   | 0  | 0  | 0  | 0   | 0  | 0   |
| <i>Gentiana lutea</i>                                    | I   | 0   | 0  | 0  | I  | 0   | 0  | 0   |
| <i>Gentiana nivalis</i>                                  | 0   | III | 0  | 0  | 0  | I   | 0  | 0   |
| <i>Gentiana nivalis</i>                                  | 0   | 0   | 0  | 0  | 0  | 0   | 0  | 0   |
| <i>Gentiana verna</i>                                    | 0   | 0   | 0  | I  | 0  | 0   | 0  | 0   |
| <i>Geranium sylvaticum</i>                               | IV  | 0   | 0  | 0  | I  | 0   | 0  | 0   |
| <i>Geum montanum</i>                                     | 0   | 0   | I  | 0  | 0  | 0   | 0  | 0   |
| <i>Geum rivale</i>                                       | 0   | 0   | 0  | 0  | 0  | I   | 0  | 0   |
| <i>Gnaphalium supinum</i>                                | 0   | 0   | 0  | 0  | I  | 0   | 0  | 0   |
| <i>Gnaphalium sylvaticum</i>                             | 0   | 0   | I  | 0  | 0  | I   | 0  | II  |
| <i>Helianthemum alpestre</i>                             | II  | II  | 0  | 0  | 0  | 0   | 0  | 0   |
| <i>Helianthemum nummularium</i> ssp. <i>nummularium</i>  | 0   | III | 0  | I  | 0  | 0   | 0  | 0   |
| <i>Helianthemum nummularium</i> ssp. <i>grandiflorum</i> | IV  | 0   | 0  | 0  | 0  | 0   | I  | 0   |
| <i>Helleborus purpurascens</i>                           | 0   | 0   | 0  | 0  | 0  | 0   | 0  | IV  |
| <i>Heracleum spondylium</i> ssp. <i>transsilvanicum</i>  | 0   | 0   | 0  | 0  | 0  | III | 0  | 0   |
| <i>Hieracium alpinum</i>                                 | 0   | 0   | 0  | 0  | I  | 0   | I  | 0   |
| <i>Hieracium aurantiacum</i> ssp. <i>aurantiacum</i>     | 0   | 0   | 0  | 0  | 0  | 0   | 0  | I   |
| <i>Hieracium lactucella</i>                              | 0   | 0   | 0  | 0  | 0  | 0   | 0  | 0   |
| <i>Hieracium pilosella</i>                               | 0   | 0   | 0  | 0  | II | 0   | II | I   |
| <i>Hieracium rotundatum</i>                              | 0   | 0   | 0  | 0  | 0  | 0   | 0  | 0   |
| <i>Hieracium villosum</i>                                | 0   | 0   | 0  | II | 0  | 0   | 0  | 0   |

|                                        |    |     |   |     |     |     |     |     |
|----------------------------------------|----|-----|---|-----|-----|-----|-----|-----|
| Homogyne alpina                        | 0  | 0   | 0 | 0   | 0   | I   | I   | III |
| Hypericum maculatum                    | 0  | 0   | 0 | 0   | III | 0   | I   | I   |
| Hypericum richeri ssp. grisebachii     | I  | 0   | 0 | I   | 0   | 0   | I   | 0   |
| Hypochaeris uniflora                   | I  | 0   | I | 0   | I   | 0   | 0   | 0   |
| Inula ensifolia                        | 0  | 0   | 0 | 0   | 0   | 0   | 0   | 0   |
| Iris ruthenica                         | I  | 0   | 0 | I   | 0   | 0   | I   | 0   |
| Isatis tinctoria                       | 0  | 0   | 0 | 0   | 0   | 0   | 0   | 0   |
| Juncus trifidus                        | 0  | 0   | 0 | 0   | 0   | 0   | 0   | 0   |
| Knautia longifolia                     | IV | II  | 0 | III | 0   | 0   | 0   | 0   |
| Kobresia myosuroides                   | 0  | 0   | 0 | 0   | 0   | 0   | 0   | 0   |
| Koeleria macrantha ssp. transsilvanica | II | III | 0 | 0   | 0   | 0   | I   | 0   |
| Leontodon autumnalis ssp. autumnalis   | 0  | 0   | 0 | 0   | I   | 0   | 0   | III |
| Leontodon hispidus ssp. hispidus       | 0  | 0   | 0 | 0   | 0   | 0   | II  | I   |
| Leontopodium alpinum                   | I  | II  | 0 | 0   | 0   | 0   | 0   | 0   |
| Leucanthemum vulgare                   | 0  | 0   | 0 | 0   | 0   | III | 0   | I   |
| Leucanthemum waldsteini                | 0  | 0   | 0 | II  | 0   | 0   | 0   | 0   |
| Ligularia sibirica                     | 0  | 0   | 0 | 0   | II  | 0   | I   | 0   |
| Ligusticum mutellina                   | 0  | 0   | 0 | 0   | 0   | I   | 0   | 0   |
| Linum catharticum                      | 0  | 0   | 0 | I   | 0   | 0   | 0   | III |
| Linum perenne ssp.extraaxilare         | IV | I   | 0 | 0   | 0   | 0   | 0   | 0   |
| Loiseleria procumbens                  | 0  | 0   | 0 | II  | 0   | 0   | III | 0   |
| Lomatogonium carthiacum                | 0  | 0   | 0 | 0   | 0   | 0   | 0   | 0   |
| Lotus corniculatus                     | IV | 0   | 0 | 0   | 0   | 0   | 0   | III |
| Luzula luzuloides ssp. cuprina         | I  | 0   | 0 | 0   | III | 0   | 0   | II  |
| Luzula multiflora                      | 0  | III | 0 | 0   | 0   | 0   | 0   | II  |
| Luzula spicata                         | 0  | 0   | 0 | I   | 0   | 0   | 0   | 0   |
| Luzula sudetica                        | 0  | 0   | 0 | 0   | 0   | I   | 0   | 0   |
| Luzula sylvatica                       | 0  | 0   | 0 | 0   | II  | 0   | 0   | 0   |
| Minuartia sedoides                     | 0  | 0   | 0 | 0   | 0   | 0   | 0   | 0   |
| Minuartia verna                        | 0  | 0   | 0 | II  | 0   | 0   | 0   | 0   |

|                                      |     |     |   |    |     |     |   |     |
|--------------------------------------|-----|-----|---|----|-----|-----|---|-----|
| Myosotis alpestris                   | III | 0   | 0 | 0  | 0   | 0   | 0 | 0   |
| Nardus stricta                       | 0   | 0   | 0 | 0  | II  | 0   | 0 | V   |
| Nigritella rubra                     | 0   | I   | 0 | 0  | 0   | 0   | 0 | 0   |
| Onobrychis transsilvanica            | IV  | 0   | 0 | 0  | 0   | 0   | 0 | 0   |
| Origanum vulgare                     | 0   | 0   | 0 | II | 0   | 0   | 0 | 0   |
| Oxytropis carpatica                  | 0   | 0   | 0 | I  | 0   | 0   | 0 | 0   |
| Parnasia palustris                   | II  | IV  | 0 | 0  | 0   | 0   | 0 | 0   |
| Pedicularis verticillata             | 0   | 0   | 0 | 0  | 0   | I   | 0 | 0   |
| Phleum alpinum                       | 0   | 0   | 0 | 0  | 0   | 0   | I | II  |
| Phyteuma orbiculare                  | I   | III | 0 | 0  | 0   | 0   | 0 | 0   |
| Pimpinella saxifraga                 | III | 0   | 0 | IV | 0   | 0   | 0 | 0   |
| Pinguicula vulgaris                  | 0   | 0   | 0 | 0  | 0   | III | 0 | I   |
| Plantago lanceolata                  | 0   | 0   | 0 | 0  | 0   | 0   | 0 | I   |
| Poa alpina                           | 0   | 0   | 0 | II | 0   | 0   | 0 | 0   |
| Poa media                            | 0   | 0   | 0 | 0  | III | 0   | 0 | 0   |
| Poa molinerii spp. glacialis         | 0   | 0   | 0 | 0  | 0   | 0   | 0 | 0   |
| Poa nemoralis                        | III | I   | 0 | 0  | 0   | 0   | 0 | 0   |
| Polygala alpestris                   | II  | 0   | 0 | I  | 0   | 0   | 0 | 0   |
| Polygonum bistorta                   | 0   | 0   | 0 | 0  | 0   | 0   | 0 | I   |
| Polygonum viviparum                  | III | IV  | 0 | 0  | 0   | 0   | 0 | 0   |
| Potentilla aurea ssp. chrisocraspeda | 0   | IV  | 0 | 0  | 0   | 0   | 0 | III |
| Potentilla crantzii                  | 0   | I   | 0 | I  | 0   | I   | 0 | 0   |
| Potentilla erecta                    | 0   | 0   | 0 | 0  | II  | 0   | 0 | IV  |
| Potentilla thuringiaca               | 0   | II  | 0 | 0  | 0   | 0   | I | 0   |
| Primula elatior                      | 0   | 0   | 0 | 0  | 0   | 0   | 0 | 0   |
| Primula halleri                      | 0   | II  | 0 | 0  | 0   | 0   | 0 | 0   |
| Primula minima                       | 0   | 0   | 0 | 0  | I   | 0   | 0 | 0   |
| Prunella vulgaris                    | 0   | 0   | 0 | 0  | 0   | 0   | 0 | 0   |
| Pseudorchis albida                   | 0   | 0   | 0 | 0  | 0   | I   | 0 | 0   |
| Pulsatilla alba                      | 0   | I   | 0 | 0  | I   | 0   | 0 | 0   |

|                                      |    |     |     |    |    |     |    |     |
|--------------------------------------|----|-----|-----|----|----|-----|----|-----|
| Ranunculus oreophilus                | 0  | 0   | 0   | II | 0  | 0   | 0  | 0   |
| Ranunculus pseudomontanus            | 0  | II  | 0   | 0  | 0  | 0   | II | II  |
| Ranunculus serpens ssp. nemorosus    | 0  | 0   | 0   | 0  | 0  | 0   | 0  | I   |
| Rhinanthus alpinus                   | I  | 0   | 0   | 0  | 0  | 0   | 0  | 0   |
| Rhodiola rosea                       | 0  | 0   | 0   | I  | 0  | I   | 0  | 0   |
| Rhododendron myrtifolii              | 0  | 0   | 0   | 0  | 0  | 0   | 0  | 0   |
| Rumex alpinus                        | 0  | 0   | 0   | 0  | 0  | 0   | 0  | I   |
| Rumex arifolius                      | 0  | 0   | 0   | 0  | 0  | I   | 0  | 0   |
| Salix herbacea                       | 0  | 0   | I   | 0  | I  | 0   | 0  | 0   |
| Salvia glutinosa                     | 0  | 0   | 0   | 0  | 0  | 0   | 0  | 0   |
| Saussurea discolor                   | 0  | 0   | 0   | 0  | 0  | 0   | 0  | 0   |
| Saxifraga aizoides                   | 0  | 0   | 0   | 0  | 0  | 0   | 0  | 0   |
| Saxifraga exarata ssp. moschata      | 0  | 0   | III | 0  | 0  | 0   | 0  | 0   |
| Saxifraga oppositifolia              | 0  | 0   | 0   | 0  | II | 0   | 0  | 0   |
| Saxifraga paniculata                 | I  | 0   | 0   | I  | 0  | 0   | 0  | 0   |
| Scabiosa lucida                      | II | III | 0   | 0  | 0  | 0   | II | 0   |
| Scleranthus perennis ssp. marginatus | 0  | 0   | 0   | 0  | I  | 0   | 0  | 0   |
| Scorzonera purpurea ssp. rosea       | 0  | I   | 0   | 0  | 0  | 0   | 0  | III |
| Sedum alpestre                       | 0  | 0   | 0   | 0  | 0  | 0   | 0  | 0   |
| Sedum atratum                        | 0  | 0   | 0   | I  | 0  | I   | 0  | 0   |
| Senecio carpaticus                   | I  | II  | 0   | 0  | I  | 0   | 0  | 0   |
| Senecio ovatus                       | 0  | 0   | 0   | 0  | 0  | 0   | 0  | 0   |
| Senecio rupester                     | 0  | 0   | III | 0  | 0  | 0   | 0  | 0   |
| Seseli libanotis                     | I  | 0   | 0   | 0  | 0  | 0   | 0  | 0   |
| Sesleria bielzii                     | 0  | 0   | 0   | 0  | 0  | 0   | 0  | 0   |
| Sesleria coerulans                   | 0  | 0   | 0   | I  | 0  | III | 0  | 0   |
| Sesleria rigida                      | V  | 0   | 0   | 0  | 0  | I   | 0  | 0   |
| Silene acaulis                       | 0  | 0   | 0   | 0  | 0  | 0   | 0  | 0   |
| Silene italica ssp. nemoralis        | 0  | 0   | I   | 0  | 0  | 0   | I  | 0   |
| Silene pusilla                       | 0  | 0   | 0   | 0  | 0  | I   | 0  | 0   |

|                                              |    |    |     |    |   |     |    |     |
|----------------------------------------------|----|----|-----|----|---|-----|----|-----|
| <i>Silene vulgaris</i>                       | 0  | 0  | 0   | 0  | 0 | 0   | 0  | 0   |
| <i>Soldanella montana</i>                    | 0  | I  | 0   | 0  | I | 0   | 0  | II  |
| <i>Solidago virgaurea</i> ssp. <i>minuta</i> | 0  | 0  | III | 0  | 0 | 0   | I  | 0   |
| <i>Stachys officinalis</i>                   | 0  | 0  | 0   | 0  | 0 | 0   | 0  | II  |
| <i>Stellaria graminea</i>                    | 0  | 0  | 0   | 0  | 0 | 0   | 0  | II  |
| <i>Taraxacum nigricans</i>                   | 0  | 0  | 0   | 0  | 0 | 0   | 0  | 0   |
| <i>Taraxacum officinale</i>                  | 0  | 0  | 0   | 0  | 0 | 0   | 0  | 0   |
| <i>Thymus comosus</i>                        | 0  | 0  | 0   | 0  | 0 | 0   | 0  | 0   |
| <i>Thymus pulcherrimus</i>                   | 0  | 0  | 0   | 0  | 0 | 0   | 0  | 0   |
| <i>Thymus pulegioides</i>                    | 0  | 0  | 0   | I  | 0 | 0   | 0  | 0   |
| <i>Thymus pulegioides</i>                    | 0  | 0  | 0   | 0  | 0 | 0   | 0  | IV  |
| <i>Thymus purrcherimus</i>                   | 0  | IV | 0   | 0  | 0 | 0   | 0  | 0   |
| <i>Trifolium alpestre</i>                    | 0  | II | 0   | II | 0 | III | 0  | 0   |
| <i>Trifolium pratense</i>                    | II | 0  | 0   | 0  | 0 | 0   | 0  | III |
| <i>Trifolium repens</i>                      | 0  | 0  | 0   | 0  | 0 | 0   | II | V   |
| <i>Trisetum alpestre</i>                     | 0  | 0  | 0   | I  | 0 | 0   | 0  | 0   |
| <i>Trisetum fuscum</i>                       | 0  | 0  | 0   | 0  | 0 | I   | 0  | 0   |
| <i>Vaccinium myrtillus</i>                   | 0  | 0  | 0   | 0  | I | 0   | 0  | IV  |
| <i>Vaccinium uliginosum</i>                  | 0  | 0  | 0   | 0  | 0 | 0   | 0  | 0   |
| <i>Vaccinium vitis-idaea</i>                 | 0  | 0  | II  | 0  | 0 | 0   | 0  | IV  |
| <i>Valeriana montana</i>                     | 0  | 0  | 0   | 0  | 0 | III | 0  | 0   |
| <i>Veratrum album</i> ssp. <i>lobelianum</i> | 0  | 0  | 0   | I  | 0 | 0   | I  | 0   |
| <i>Veronica bellidioides</i>                 | 0  | 0  | 0   | 0  | 0 | 0   | 0  | 0   |
| <i>Veronica chamaedrys</i>                   | 0  | 0  | 0   | 0  | 0 | 0   | 0  | III |
| <i>Veronica officinalis</i>                  | 0  | 0  | 0   | 0  | 0 | 0   | 0  | IV  |
| <i>Vicia cracca</i>                          | I  | 0  | 0   | I  | 0 | 0   | 0  | 0   |
| <i>Viola alpina</i>                          | 0  | 0  | 0   | 0  | 0 | 0   | 0  | 0   |
| <i>Viola biflora</i>                         | 0  | 0  | 0   | 0  | 0 | III | 0  | 0   |
| <i>Viola canina</i>                          | 0  | 0  | 0   | 0  | 0 | 0   | I  | IV  |
| <i>Viola declinata</i>                       | 0  | 0  | III | 0  | 0 | 0   | 0  | 0   |



Table S1

| Index           | Alt      | Asp       | Slope     | Veg_cov   | Sam_area | Agr_cap_cap | Agr_rup  | Al fla   | Alc_xan   | Ant_odo  |
|-----------------|----------|-----------|-----------|-----------|----------|-------------|----------|----------|-----------|----------|
| N               | 45       | 45        | 45        | 45        | 45       | 45          | 45       | 45       | 45        | 45       |
| Shapiro-Wilk W  | 0,8092   | 0,7849    | 0,8972    | 0,948     | 0,801    | 0,3069      | 0,5098   | 0,5526   | 0,395     | 0,6503   |
| p(normal)       | 3,82E-06 | 1,13E-06  | 0,0007784 | 0,04262   | 2,51E-06 | 2,81E-13    | 4,74E-11 | 1,68E-10 | 2,24E-12  | 4,23E-09 |
| Jarque-Bera JB  | 81,36    | 6,848     | 5,11      | 2,403     | 4,889    | 1504        | 98,41    | 9,825    | 589,4     | 95,1     |
| p(normal)       | 2,16E-18 | 0,03258   | 0,07768   | 0,3008    | 0,08676  | 0           | 4,28E-22 | 0,007353 | 1,02E-128 | 2,24E-21 |
| p(Monte Carlo)  | 0,0002   | 0,0315    | 0,0439    | 0,1539    | 0,0459   | 0,0001      | 0,0001   | 0,0177   | 0,0001    | 0,0001   |
| Chi^2           | 6,4667   | 13,578    | 2,9111    | 8,4222    | 17,311   | 93,4        | 69,044   | 64,6     | 87,711    | 41,133   |
| p(normal)       | 0,010992 | 0,0002289 | 0,087971  | 0,0037066 | 3,17E-05 | 4,27E-22    | 9,63E-17 | 9,18E-16 | 7,57E-21  | 1,42E-10 |
| Chi^2 OK (N>20) | YES      | YES       | YES       | YES       | YES      | YES         | YES      | YES      | YES       | YES      |

Table S1 continued

| Index           | Asp_cap  | Bel_var  | Bis_lae  | Bup_fal_cer | Cam_ser  | Car_ker  | Car_sem  | Cer_arv_ler | Cer_tra  | Des_cae  |
|-----------------|----------|----------|----------|-------------|----------|----------|----------|-------------|----------|----------|
| N               | 45       | 45       | 45       | 45          | 45       | 45       | 45       | 45          | 45       | 45       |
| Shapiro-Wilk W  | 0,4024   | 0,4041   | 0,4354   | 0,4906      | 0,2721   | 0,4354   | 0,7061   | 0,5711      | 0,4142   | 0,4515   |
| p(normal)       | 2,69E-12 | 2,81E-12 | 6,23E-12 | 2,75E-11    | 1,31E-13 | 6,23E-12 | 3,50E-08 | 2,97E-10    | 3,62E-12 | 9,50E-12 |
| Jarque-Bera JB  | 48,11    | 61,96    | 31,97    | 16,99       | 280,7    | 31,97    | 93,01    | 107,4       | 153,2    | 100,6    |
| p(normal)       | 3,57E-11 | 3,51E-14 | 1,14E-07 | 0,0002043   | 1,10E-61 | 1,14E-07 | 6,37E-21 | 4,87E-24    | 5,38E-34 | 1,46E-22 |
| p(Monte Carlo)  | 0,0003   | 0,0002   | 0,0011   | 0,0045      | 0,0001   | 0,0014   | 0,0002   | 0,0002      | 0,0001   | 0,0001   |
| Chi^2           | 93,4     | 93,4     | 87,711   | 77,4        | 112,6    | 87,711   | 23,533   | 64,6        | 93,4     | 87,711   |
| p(normal)       | 4,27E-22 | 4,27E-22 | 7,57E-21 | 1,40E-18    | 2,64E-26 | 7,57E-21 | 1,23E-06 | 9,18E-16    | 4,27E-22 | 7,57E-21 |
| Chi^2 OK (N>20) | YES      | YES      | YES      | YES         | YES      | YES      | YES      | YES         | YES      | YES      |

Table S1 continued

| Index          | Des_fle  | Dia_ten  | Dry_oct  | Fes_air  | Fes_ame  | Fes_nig  | Fes_rup_sax | Fes_ver  | Gal_an   | Gal_ver  |
|----------------|----------|----------|----------|----------|----------|----------|-------------|----------|----------|----------|
| N              | 45       | 45       | 45       | 45       | 45       | 45       | 45          | 45       | 45       | 45       |
| Shapiro-Wilk W | 0,4277   | 0,4515   | 0,4354   | 0,5772   | 0,5148   | 0,5304   | 0,4515      | 0,4779   | 0,4549   | 0,4024   |
| p(normal)      | 5,11E-12 | 9,50E-12 | 6,23E-12 | 3,60E-10 | 5,46E-11 | 8,60E-11 | 9,50E-12    | 1,94E-11 | 1,04E-11 | 2,69E-12 |



Table S1 continued

| Index           | Ses_rig_hay | Thy_pul   | Thy_pur  | Tri_rep  | Ver_off  | Vio_dec  |
|-----------------|-------------|-----------|----------|----------|----------|----------|
| N               | 45          | 45        | 45       | 45       | 45       | 45       |
| Shapiro-Wilk W  | 0,6291      | 0,4242    | 0,4105   | 0,5429   | 0,4024   | 0,4354   |
| p(normal)       | 2,00E-09    | 4,67E-12  | 3,30E-12 | 1,25E-10 | 2,69E-12 | 6,23E-12 |
| Jarque-Bera JB  | 35,03       | 683,4     | 138,9    | 39,9     | 48,11    | 31,97    |
| p(normal)       | 2,47E-08    | 4,07E-149 | 6,89E-31 | 2,17E-09 | 3,57E-11 | 1,14E-07 |
| p(Monte Carlo)  | 0,0008      | 0,0001    | 0,0001   | 0,0004   | 0,0004   | 0,0016   |
| Chi^2           | 54,644      | 77,4      | 93,4     | 72,778   | 93,4     | 87,711   |
| p(normal)       | 1,44E-13    | 1,40E-18  | 4,27E-22 | 1,45E-17 | 4,27E-22 | 7,57E-21 |
| Chi^2 OK (N>20) | YES         | YES       | YES      | YES      | YES      | YES      |
